# Supplementary material for: Crickets alter wind-elicited escape strategies depending on acoustic context
Source: PubMed Central journal article supplement (PMC5680309; doi:10.1038/s41598-017-15276-x), 2017-11-09
Supplement: 41598_2017_15276_MOESM1_ESM.pdf [file 41598_2017_15276_MOESM1_ESM.pdf]

## **Crickets alter wind-elicited escape strategies depending on acoustic context**

Matasaburo Fukutomi and Hiroto Ogawa

**Supplementary Figure**

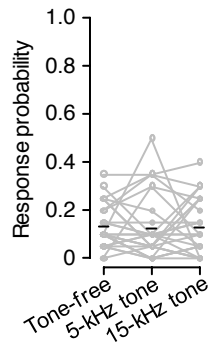

**Figure S1.** Probability of walking initiation for the period of 800 ms before the onset of an air-puff. There was no significant difference in the response probabilities among the three types of stimulation ( $p = 0.3679$ , Friedman's test), meaning that an auditory stimulus of 5- or 15-kHz frequency triggered no walking in crickets on its own.
